# CORRECTION

## Correction: High mortality of blue, humpback and fin whales from modeling of vessel collisions on the U.S. West Coast suggests population impacts and insufficient protection

R. Cotton Rockwood, John Calambokidis, Jaime Jahncke

The column heading "Mortality per  $10^4 \text{ km}^2$ " for Tables 4–9 appears incorrectly. Please see the corrected Tables 4–9 here.

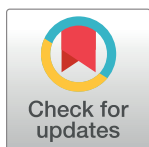

## OPEN ACCESS

**Citation:** Rockwood RC, Calambokidis J, Jahncke J (2018) Correction: High mortality of blue, humpback and fin whales from modeling of vessel collisions on the U.S. West Coast suggests population impacts and insufficient protection. PLoS ONE 13(7): e0201080. <https://doi.org/10.1371/journal.pone.0201080>

**Published:** July 16, 2018

**Copyright:** © 2018 Rockwood et al. This is an open access article distributed under the terms of the [Creative Commons Attribution License](https://creativecommons.org/licenses/by/4.0/), which permits unrestricted use, distribution, and reproduction in any medium, provided the original author and source are credited.

**Table 4. Statistics of blue whale strike mortality within the Biologically Important Areas (BIAs) defined in Calambokidis et al. 2015.** Total mortality, mortality per 100,000 km<sup>2</sup> and percent of total study area mortality are reported for each BIA.

| Name                                | BIA Area (km <sup>2</sup> ) | Months of peak abundance | Area Mortality | Mortality per 10 <sup>5</sup> km <sup>2</sup> | Percent of total mortality |
|-------------------------------------|-----------------------------|--------------------------|----------------|-----------------------------------------------|----------------------------|
| Gulf of the Farallones              | 5,243                       | July—November            | <1             | 14                                            | 4%                         |
| Monterey Bay to Pescadero Pt        | 2,378                       | July—October             | <1             | 4                                             | <1%                        |
| Santa Barbara Channel to San Miguel | 1,981                       | June—October             | <1             | 22                                            | 2%                         |
| Pt Conception to Pt Sal             | 1,743                       | June—October             | <1             | 9                                             | <1%                        |
| Pt Arena to Fort Bragg              | 1,419                       | August—November          | <1             | 1                                             | <1%                        |
| Santa Monica Bay to Long Beach      | 1,187                       | June—October             | <1             | 51                                            | 3%                         |
| Tanner-Cortez Bank                  | 1,076                       | June—October             | <1             | 5                                             | <1%                        |
| San Diego                           | 984                         | June—October             | <1             | 20                                            | 1%                         |
| San Nicholas Is                     | 427                         | June—October             | <1             | 3                                             | <1%                        |

<https://doi.org/10.1371/journal.pone.0201080.t001>

**Table 5. Statistics of humpback whale strike mortality within the Biologically Important Areas (BIAs) defined in Calambokidis et al. 2015.** Total mortality, mortality per 100,000 km<sup>2</sup> and percent of total study area mortality are reported for each BIA.

| Name                                | BIA Area (km <sup>2</sup> ) | Months of peak abundance | Area Mortality | Mortality per 10 <sup>5</sup> km <sup>2</sup> | Percent of total mortality |
|-------------------------------------|-----------------------------|--------------------------|----------------|-----------------------------------------------|----------------------------|
| Gulf of the Farallones—Monterey Bay | 9,761                       | July—November            | 3              | 32                                            | 17%                        |
| Northern WA                         | 3,393                       | May—November             | <1             | 6                                             | 1%                         |
| Stonewall and Heceta Bank           | 2,573                       | May—November             | <1             | <1                                            | <1%                        |
| Santa Barbara Channel—San Miguel    | 2,639                       | March—September          | <1             | 15                                            | 2%                         |
| Morro Bay to Pt Sal                 | 1,908                       | April—November           | <1             | 2                                             | <1%                        |
| Fort Bragg to Pt. Arena             | 1,591                       | July—November            | <1             | 2                                             | <1%                        |
| Pt St. George                       | 1,233                       | July—November            | <1             | <1                                            | <1%                        |

<https://doi.org/10.1371/journal.pone.0201080.t002>

**Table 6. Mortality statistics for shipping lanes.** Mortality per 100,000 km<sup>2</sup> and percent of total study area mortality are also reported for each region.

| Region               | Blue Whales             |                |                                               |                            | Humpback Whales |                                               |                            | Fin Whales     |                                               |                            |
|----------------------|-------------------------|----------------|-----------------------------------------------|----------------------------|-----------------|-----------------------------------------------|----------------------------|----------------|-----------------------------------------------|----------------------------|
|                      | Area (km <sup>2</sup> ) | Area Mortality | Mortality per 10 <sup>5</sup> km <sup>2</sup> | Percent of total mortality | Area Mortality  | Mortality per 10 <sup>5</sup> km <sup>2</sup> | Percent of total mortality | Area Mortality | Mortality per 10 <sup>5</sup> km <sup>2</sup> | Percent of total mortality |
| San Francisco        | 1,136                   | 1              | 65                                            | 4%                         | 3               | 255                                           | 13%                        | <1             | 20                                            | <1%                        |
| Southern California  | 2,314                   | 1              | 61                                            | 8%                         | <1              | 36                                            | 4%                         | 1              | 48                                            | 3%                         |
| Washington           | 166                     | <1             | 4                                             | <1%                        | <1              | 6                                             | <1%                        | <1             | <1                                            | <1%                        |
| Waters outside lanes | 798,015                 | 16             | 2                                             | 86%                        | 18              | 2                                             | 81%                        | 41             | 5                                             | 96%                        |

<https://doi.org/10.1371/journal.pone.0201080.t003>

**Table 7. Mortality within National Marine Sanctuaries.** Mortality per 100,000 km<sup>2</sup> and percent of total study area mortality are also reported for each sanctuary.

| National Marine Sanctuary | Blue Whales             |                |                                               |                            | Humpback Whales |                                               |                            | Fin Whales     |                                               |                            |
|---------------------------|-------------------------|----------------|-----------------------------------------------|----------------------------|-----------------|-----------------------------------------------|----------------------------|----------------|-----------------------------------------------|----------------------------|
|                           | Area (km <sup>2</sup> ) | Area Mortality | Mortality per 10 <sup>5</sup> km <sup>2</sup> | Percent of total mortality | Area Mortality  | Mortality per 10 <sup>5</sup> km <sup>2</sup> | Percent of total mortality | Area Mortality | Mortality per 10 <sup>5</sup> km <sup>2</sup> | Percent of total mortality |
| Cordell Bank              | 3,331                   | <1             | 12                                            | 2%                         | 1               | 34                                            | 5%                         | <1             | 10                                            | <1%                        |
| Channel Islands           | 3,818                   | <1             | 13                                            | 3%                         | <1              | 6                                             | 1%                         | <1             | 10                                            | <1%                        |
| Greater Farallones        | 8,548                   | 1              | 14                                            | 7%                         | 4               | 49                                            | 19%                        | <1             | 7                                             | 1%                         |
| Monterey Bay              | 15,795                  | <1             | 5                                             | 4%                         | 3               | 18                                            | 13%                        | 2              | 10                                            | 4%                         |
| Olympic Coast             | 8,259                   | <1             | <1                                            | <1%                        | <1              | 9                                             | 4%                         | <1             | <1                                            | <1%                        |

<https://doi.org/10.1371/journal.pone.0201080.t004>

**Table 8. Mortality within sovereign waters (3 Nm offshore) for each of the three west coast states, California, Oregon and Washington.** Mortality per 100,000 km<sup>2</sup> and percent of total study area mortality are also reported for each state.

| Jurisdiction Name | Area (km <sup>2</sup> ) | Blue Whale     |                                               |                            | Humpback Whale |                                               |                            | Fin Whale      |                                               |                            |
|-------------------|-------------------------|----------------|-----------------------------------------------|----------------------------|----------------|-----------------------------------------------|----------------------------|----------------|-----------------------------------------------|----------------------------|
|                   |                         | Area mortality | Mortality per 10 <sup>5</sup> km <sup>2</sup> | Percent of total mortality | Area mortality | Mortality per 10 <sup>5</sup> km <sup>2</sup> | Percent of total mortality | Area mortality | Mortality per 10 <sup>5</sup> km <sup>2</sup> | Percent of total mortality |
| California        | 14,280                  | <1             | 5                                             | 4%                         | <1             | 4                                             | 3%                         | <1             | 2                                             | <1%                        |
| Oregon            | 3,268                   | <1             | <1                                            | <1%                        | <1             | 2                                             | <1%                        | <1             | <1                                            | <1%                        |
| Washington        | 2,049                   | <1             | <1                                            | <1%                        | <1             | 2                                             | <1%                        | <1             | <1                                            | <1%                        |

<https://doi.org/10.1371/journal.pone.0201080.t005>

**Table 9. Mortality on and off the continental shelf (defined by the 200-meter isobath).** Mortality per 100,000 km<sup>2</sup> and percent of total study area mortality are also reported for each region.

| Area Name         | Area (km <sup>2</sup> ) | BLWH Mortality |                                               |                            | HUWH Mortality |                                               |                            | FIWH Mortality |                                               |                            |
|-------------------|-------------------------|----------------|-----------------------------------------------|----------------------------|----------------|-----------------------------------------------|----------------------------|----------------|-----------------------------------------------|----------------------------|
|                   |                         | Area mortality | Mortality per 10 <sup>5</sup> km <sup>2</sup> | Percent of total mortality | Area mortality | Mortality per 10 <sup>5</sup> km <sup>2</sup> | Percent of total mortality | Area mortality | Mortality per 10 <sup>5</sup> km <sup>2</sup> | Percent of total mortality |
| Continental shelf | 57,030                  | 3              | 5                                             | 15%                        | 8              | 14                                            | 36%                        | 1              | 2                                             | 3%                         |
| >200m             | 754,905                 | 15             | 2                                             | 85%                        | 14             | 2                                             | 64%                        | 41             | 6                                             | 97%                        |

<https://doi.org/10.1371/journal.pone.0201080.t006>

In the Results and Discussion sections, the units for "mortality per area" and "strike intensity" also appear incorrectly. The correct units for "mortality per area" and "strike intensity" should be 10<sup>5</sup> km<sup>2</sup>.

## Reference

1. Rockwood RC, Calambokidis J, Jahncke J (2017) High mortality of blue, humpback and fin whales from modeling of vessel collisions on the U.S. West Coast suggests population impacts and insufficient protection. PLoS ONE 12(8): e0183052. <https://doi.org/10.1371/journal.pone.0183052> PMID: 28827838
